# Soil phosphorus composition, loss risk and contribution to the aquatic environment in a typical agricultural area

Tianhai Ma, Ying Bai and Xiaohong Ruan

## ABSTRACT

River eutrophication risk increased significantly in agricultural areas. In this paper, spatial variability of soil phosphorus (P) and loss risk in the Jialu River Basin, China, were analyzed using a geostatistical approach. The correlation between soil and river sediment P was analyzed to identify the main aquatic P source. The results showed that inorganic phosphorus (IP) was the main form of soil TP (82.13%), but the ratio of apatite phosphorus (AP) and non-apatite phosphorus (NAIP) varied between different soil types. AP was the primary form of IP in fluvo-aquic cinnamon soil, while NAIP dominated in meadow aeolian sandy soil. Calculated soil total dissolvable P (TDP, 94–622 mg/kg) exceeded the environmental threshold. High TDP (>400 mg/kg) in mixed soil and sandy soil indicated a high P loss risk. The spatial variability of soil P was moderate to weak, indicating a low heterogeneity. In sediment, IP and AP showed a significant correlation with total organic carbon ( $p < 0.05$ ), indicating a P source of soil erosion. Sediment AP had a significant positive correlation with soil AP ( $p < 0.05$ ), confirming soil as the main source of sediment P. Furthermore, an accumulation of sediment P along the Jialu River and its consistency with water TP was revealed.

**Key words** | eutrophication, geostatistics, soil P loss risk, source of aquatic P, spatial variability

### Tianhai Ma

Jinling Institute of Nanjing University,  
Nanjing 210089,  
China

### Ying Bai

Xiaohong Ruan (corresponding author)  
Key Laboratory of Surficial Geochemistry,  
Ministry of Education,  
Nanjing University,  
Nanjing 210023,  
China  
and  
School of Earth Sciences and Engineering,  
Nanjing University,  
Nanjing 210023,  
China  
E-mail: [ruanxh@nju.edu.cn](mailto:ruanxh@nju.edu.cn)

## HIGHLIGHTS

- Based on a geostatistical approach, spatial variability of soil P and loss risk in Jialu River Basin, China, were analyzed.
- IP is the main form of soil TP in the Jialu River Basin and high TDP in mixed soil and sandy soil indicated a high P loss risk.
- The correlation between soil and river sediment P showed that soil is the main source of sediment P.

This is an Open Access article distributed under the terms of the Creative Commons Attribution Licence (CC BY 4.0), which permits copying, adaptation and redistribution, provided the original work is properly cited (<http://creativecommons.org/licenses/by/4.0/>).

doi: 10.2166/wqrj.2021.004

## GRAPHICAL ABSTRACT

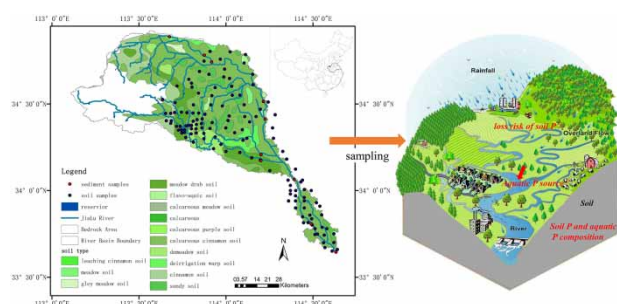

## INTRODUCTION

Phosphorus (P) is the primary limiting nutrient in most surface water, and a P concentration of over 20–35  $\mu\text{g/L}$  will cause an algal bloom in a freshwater system (Ahmad *et al.* 2016). Non-point sources P in agricultural runoff contribute to a great portion of freshwater inputs, which accelerate eutrophication and arouse global environmental concern (Sharpley *et al.* 1994). It was believed that excess fertilization and manure production caused the accumulation of surplus P in soil, some of which is transported to aquatic ecosystems (Carpenter *et al.* 1998). Soil erosion from agricultural lands, which delivers large amounts of particulate P to surface water, has become the dominant source of P accumulation in the aquatic ecosystem (around 75%; Vilmin *et al.* 2018). Therefore, the identification of soil P levels, risk of soil P loss and the impact of soil P migration on water quality are required for making sustainable P management to ensure both environmental safety and crop production (Zhou *et al.* 2004; El-Nahhal *et al.* 2014a, 2014b).

Although accurate estimations of P leaching have been conducted for some soil types (Sharpley *et al.* 1994; Bai *et al.* 2013; Jalali & Jalali 2017; Khan *et al.* 2018), they are area-specific, time-consuming and can only provide limited information for soil P leaching potential. Therefore, soil P loss evaluation from soil properties at the basin or larger scale is very important for soil P management, utilization and environmental risk control (Amundson *et al.* 2015). Based on previously published research, soil P threshold levels for agronomic and environmental purposes have been established (Feagley & Lory 2005; Sharpley *et al.*

2008; NRCS 2011), which can be used for soil P loss risk evaluation in an agricultural area. In this case, a comprehensive soil P investigation at the basin scale was essential to provide sufficient basic information.

High-resolution mapping of soil P content is necessary to identify critical source areas where a large risk of loss coincides in agricultural landscapes. However, because of the high heterogeneity of soil type and property, it is difficult to precisely interpret soil P's content and distribution. Spatial variability analysis based on geostatistics has been widely applied on soil property survey, fertilization evaluation and farmland nutrient management (Ahmad *et al.* 2016; Denton *et al.* 2017; Vasu *et al.* 2017; Laekemariam *et al.* 2018), which facilitates reliable quantitative assessment of soil P spatial heterogeneity. This may allow a better understanding of soil nutrient evolution and its dynamics, which can further assist sustainable agricultural nutrients management, soil fertility maintenance and eutrophication prevention (Mousavifard *et al.* 2013; Vasu *et al.* 2017; de Oliveira *et al.* 2018; Wenhua *et al.* 2018).

Jialu River Basin is an agriculture intensive area, the largest tributaries of the Huaihe River Basin, China, with average P fertilizer input (2000–2010) of 135.5 kg/ha yr (China 2010). The annual runoff (13.41 and 26.09  $\text{m}^3/\text{s}$  at midstream and downstream, respectively) (Tianhai *et al.* 2016) contributes 2.93 t dissolved P and a considerable amount of particulate P to the Jialu River (unpublished data). As a result, P concentration in the river water exceeds by 1–2 times China's environmental quality standard for

surface water (Ministry of Environmental Protection of P. R. China 2002), which has greatly impacted the water quality and ecological stability. On the other side, there are 11 main sluices along the Jialu River (The Huaihe River Commission of the Ministry of Water Resources, P. R. China 2010), resulting in low velocity and relatively retained hydrodynamic state, which aggregated the risk of eutrophication. Therefore, it is necessary and urgent to thoroughly investigate the soil P loss risk and its contribution to aquatic P accumulation in this representative area.

The objectives of this research were to evaluate the soil P content and loss potential in the Jialu River Basin, as well as its contribution to aquatic P. To achieve these goals, the soil P composition and spatial variability in the Jialu River Basin were depicted using geostatistics. At the same time, the correlation between soil P and aquatic P was analyzed to interpret the P transport pathway and accumulation pattern at the basin scale. This research could provide a reference for the adjustment of agricultural management practices such as fertilization recommendations and non-point source pollution control in similar agriculture intensive areas.

## MATERIALS AND METHODS

### Study area

Jialu River, one of the largest tributaries of the Huaihe River, with a total length of 255.8 km, and a catchment area of 5,896 km<sup>2</sup>. The geographical range of the Jialu River was 113°6'8"–114°38'43" E and 33°38'9"–34°55'55" N, with a decline of altitude toward the southeast (Figure 1). The average annual precipitation is 633 mm, most of which concentrates in July–September, accounting for about 60% of the annual amount. The average annual evaporation is about 1,700 mm. Jialu River Basin contains rich soil types, including KG soil, neutral calcareous soil, sand, tide soil, wet tide soil, salinization wet soil, most of which are KG soil and calcareous moist soil. Land coverage types in the basin are mainly farmland, forest and grassland, among which farmland occupies 75.1% of the total area. The main crops in the Jialu River Basin include wheat, maize, peanut and so on, with wheat–maize rotation as the main tilling method.

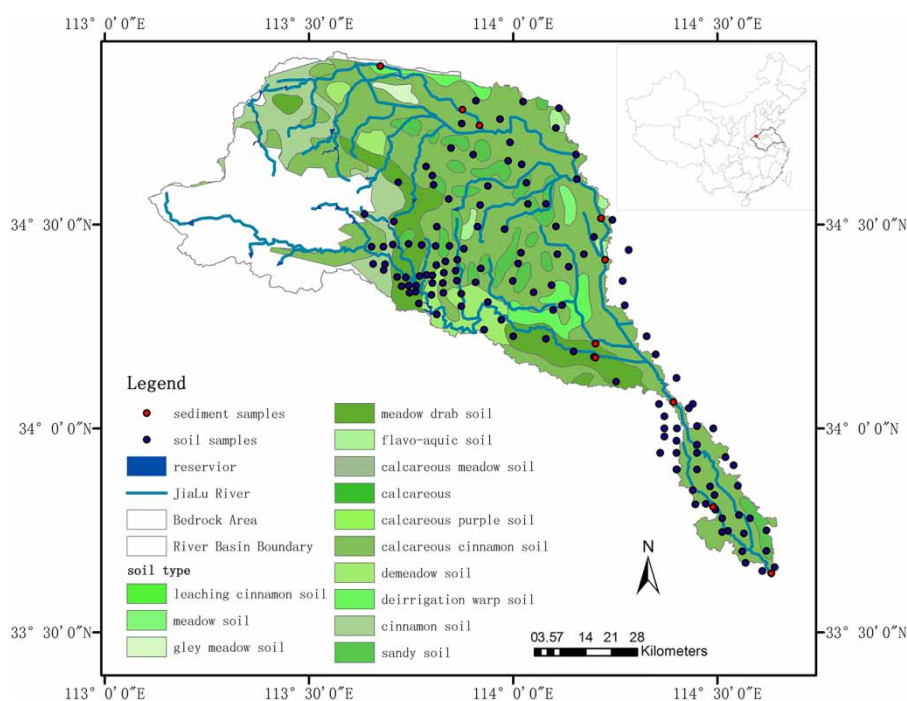

**Figure 1** | Sampling sites distribution and soil types of the research area.

## Soil sampling and P measurement

133 soil samples (1–133) and 10 sediment samples (c1–c10) within the basin were collected according to the principles of mesh points in October 2013, and the monthly river water TP data were collected from the Huaihe River Water Resources Commission (Figure 1 and Supplementary Material, Table S1). One kg of surface soil (0–20 cm depth) was collected using a ring knife. The bulk density of the sample at each site was measured immediately. Soil samples were removed from stones, weeds and other debris, stored in plastic bags and sent back to the laboratory. All samples were air-dried, sieved through 100 mesh for later use (Fu et al. 2010). Ten sediment samples (0–10 cm depth) along the Jialu River and its tributaries were collected, air-dried, passed through 100 mesh sieve and stored in plastic bags for later use.

Soil P speciation was done using the SMT (Standard Measurements and Testing) method (Hua 2010) developed under the framework of the European Commission (Figure 2). The amount of dissolved phosphate in the extract (SRP) was determined by the molybdenum antimony anti-spectro-photometric method undertaken on a UV spectro-photometer (UV-2100, Rayleigh, China). The measurement process was as follows. The concentration gradient of 0, 0.5, 1.0, 3.0, 5.0, 10.0 and 15.0 mL were taken for the standard curve. Take 0.04 g of potassium peroxydisulfate in the colorimetric tube, sealing and digesting under 120 °C for 30 min. Inject 1 mL of ascorbic acid solution in the colorimetric tube, mixing for 30 s. Inject 2 mL of molybdate

solution and mix for 15 min. Test the absorbance at the wavelength of 650 nm, with a blank sample for contrast. Each sample was measured in triplicate. Soil total organic carbon (TOC) was measured by an elemental analyzer (CHN-O-Rapid, Heraeus, Germany).

## Statistical and geostatistical analysis

The summary statistics of soil P, including minimum, maximum, mean, standard deviation and coefficient of variation were calculated using SPSS 21. Additionally, a geostatistical method was applied on spatial variability analysis of soil P by the geostatistical tool in ArcGIS 9.2 for windows (Guoan & Xin 2006).

Variogram is the essential parameter in geostatistical analysis, representing the spatial correlation of regional variables, which is calculated by the following equation (Lark 2000).

$$\gamma(h) = \frac{1}{2N(h)} \sum_{i=1}^{N(h)} [Z(x_i + h) - Z(x_i)]^2 \quad (1)$$

where  $h$  is the distance between sampling sites (lag),  $N(h)$  is pairs of observations with a distance of  $h$ ,  $Z(x_i)$  and  $Z(x_i + h)$  is the measured value of a variable with a distance of  $h$ . The best-fitting semivariogram model with minimum root-mean-square error (RMSE) is selected for each soil P type.

$$\text{RMSE} = \sqrt{\frac{\sum_{i=1}^N [Z^*(x_0) - Z(x_i)]^2}{N}} \quad (2)$$

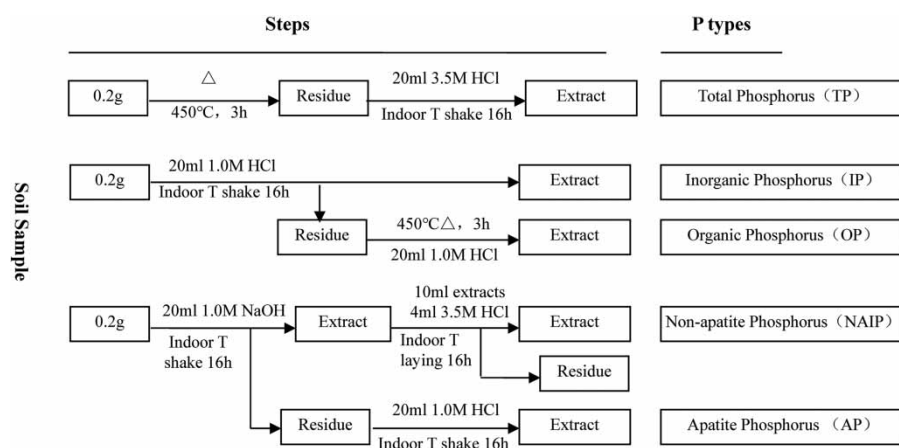

Figure 2 | SMT method of soil P speciation.

The soil P spatial distribution in the Jialu River Basin was predicted by the Ordinary Kriging interpolation method (Zhang *et al.* 2010) based on Equation (3) (Vasu *et al.* 2017).

$$Z^*(x_0) = \sum_{i=1}^N \lambda_i Z(x_i) \quad (3)$$

where  $Z^*(x_i)$  is the measured value of sample  $i$ ,  $N$  is the number of the measured value and  $\lambda_i$  is the unknown weight for the measured value of sample  $i$ .

Based on the fitted semivariogram model, spatial parameters such as nugget ( $C_0$ ), sill ( $C + C_0$ ), range and nugget coefficient ( $C_0/C + C_0$ ) were calculated. Nugget represents variation caused by stochastic factors, such as an error in measurement. Sill represents the overall sample variability. The range represents the distance at which one variable becomes spatially independent of another (Reza *et al.* 2015). Nugget coefficient represents the degree of spatial dependence, whereby a value  $<0.25$  indicates variables have a strong spatial autocorrelation,  $0.25-0.5$  indicates a significant spatial autocorrelation,  $0.5-0.75$  indicates a moderate spatial autocorrelation and  $>0.75$  indicates a weak spatial autocorrelation, under which condition random variation takes the main role (Cambardella *et al.* 1994).

Cross-validation was conducted for each semivariogram model. The comparison between measured and estimated value, mean absolute error (MAE) are used to evaluate the accuracy of prediction.

$$MAE = \sum_{i=1}^N \frac{|Z^*(x_0) - Z(x_i)|^*}{N} \quad (4)$$

**Table 1** | Statistics summary of the results of soil P analysis

| Parameter | Sample number | Maximum (mg/g) | Minimum (mg/g) | Average (mg/g) | Standard deviation | Skewness | Median | Kurtosis | Coefficient of variation |
|-----------|---------------|----------------|----------------|----------------|--------------------|----------|--------|----------|--------------------------|
| NAIP      | 132           | 0.866          | 0.016          | 0.226          | 0.187              | 0.595    | 0.221  | 2.594    | 0.82                     |
| AP        | 128           | 0.988          | 0.025          | 0.259          | 0.250              | 1.017    | 0.092  | 2.982    | 0.96                     |
| IP        | 132           | 0.958          | 0.115          | 0.468          | 0.166              | -0.012   | 0.476  | 3.024    | 0.35                     |
| OP        | 126           | 1.317          | 0.002          | 0.118          | 0.234              | 4.749    | 0.076  | 27.203   | 1.98                     |
| TP        | 132           | 1.418          | 0.136          | 0.563          | 0.219              | 0.138    | 0.584  | 3.868    | 0.39                     |
| TOC (%)   | 70            | 2.440          | N.D.           | 0.837          | 0.583              | 0.705    | 0.610  | -0.494   | 0.70                     |

Note: NAIP, Non-apatite Phosphorus; AP, Apatite Phosphorus; IP, Inorganic Phosphorus; OP, Organic Phosphorus; TP, Total Phosphorus; TOC, Total Organic Carbon.

## RESULTS AND DISCUSSION

### Soil P and aquatic P composition

In the adopted speciation method in this study, the soil P species were classified into Al/Fe/Mn hydroxide bonded phosphorus (non-apatite phosphorus, NAIP), calcium phosphate (apatite phosphorus, AP), inorganic phosphorus (IP), organic phosphorus (OP) and total phosphorus (TP). The sum of IP and OP was theoretically equal to the concentration of TP, and the sum of AP and NAIP was equal to the concentration of IP. The difference between the analytical values and the calculated values for IP and TP was within the analytical error (3–4%). The soil TP concentration in the Jialu River Basin was 0.56 mg/g soil on average and ranged between 0.14 and 1.418 mg/g. The concentration of IP ranged from 0.12 to 0.96 mg/g soil and was the main component of soil TP. The average concentration of soil OP ranged from less than 0.01 mg/g soil to 1.32 mg/g soil with an average of 0.12 mg/g soil. The coefficient of variation of OP is relatively large (1.98), showing a significant variability. On the contrary, coefficients of variation of IP and TP were all less than 0.4, representing a low variability (Table 1). The average concentration of soil AP and NAIP was 0.26 mg/g soil and 0.23 mg/g soil, respectively, with an intermediate coefficient of variation of 0.96 and 0.82.

In this research, the soil TP was at the same level as the Wenyu River Basin, China (550 mg/kg; Jianling Liu & Zhang 2000), Brittany region, France (296–2,393 mg/kg; Matos-Moreira *et al.* 2017) and Sub-Saharan Africa (130–4,400 mg/kg; Magnonea *et al.* 2017), while it appeared



lower than that in the sediments of Yellow River Delta (around 600 mg/kg; Liu *et al.* 2018) and higher than that of Danjiangkou reservoir, China (0.38–176 mg/kg; Li *et al.* 2020). IP was also the main component of soil TP in other areas (Liu & Zhang 2000).

In Jialu River, sediment TP ( $n = 10$ ) ranged from 0.271 to 0.867 mg/g (Figure 3(a)). The proportion of IP was between 77.5% and 88.9% (average 82.13%), as the main form of sediment P. The proportion of OP was less than 10%, composing only a small part of the sediment P. The proportion of NAIP varied between 14.6% and 57.1% with an average of 28.7%, indicating an obvious heterogeneity of NAIP content in sediment along the Jialu River.

P content differed significantly in each soil type (Table 2), which was closely related to soil parent material (Mocek & Owczarzak 2011) and human activities (Amundson *et al.* 2015). NAIP was the main component of IP in meadow aeolian sandy soil with an average of 89.8% (0.336/0.374 mg/g), as well as calcareous cinnamon soil with an average of 88.1% (0.333/0.378 mg/g). Meadow aeolian sandy soil composed around 7.7% of the basin area, which was formed in the ancient riverbed, receiving mainly terrigenous detrital P that led to a higher NAIP proportion, while the overall P loss was severe after long-term weathering and leaching (Squires 2009). It was the other way around in fluvo-aquic cinnamon soil where AP took

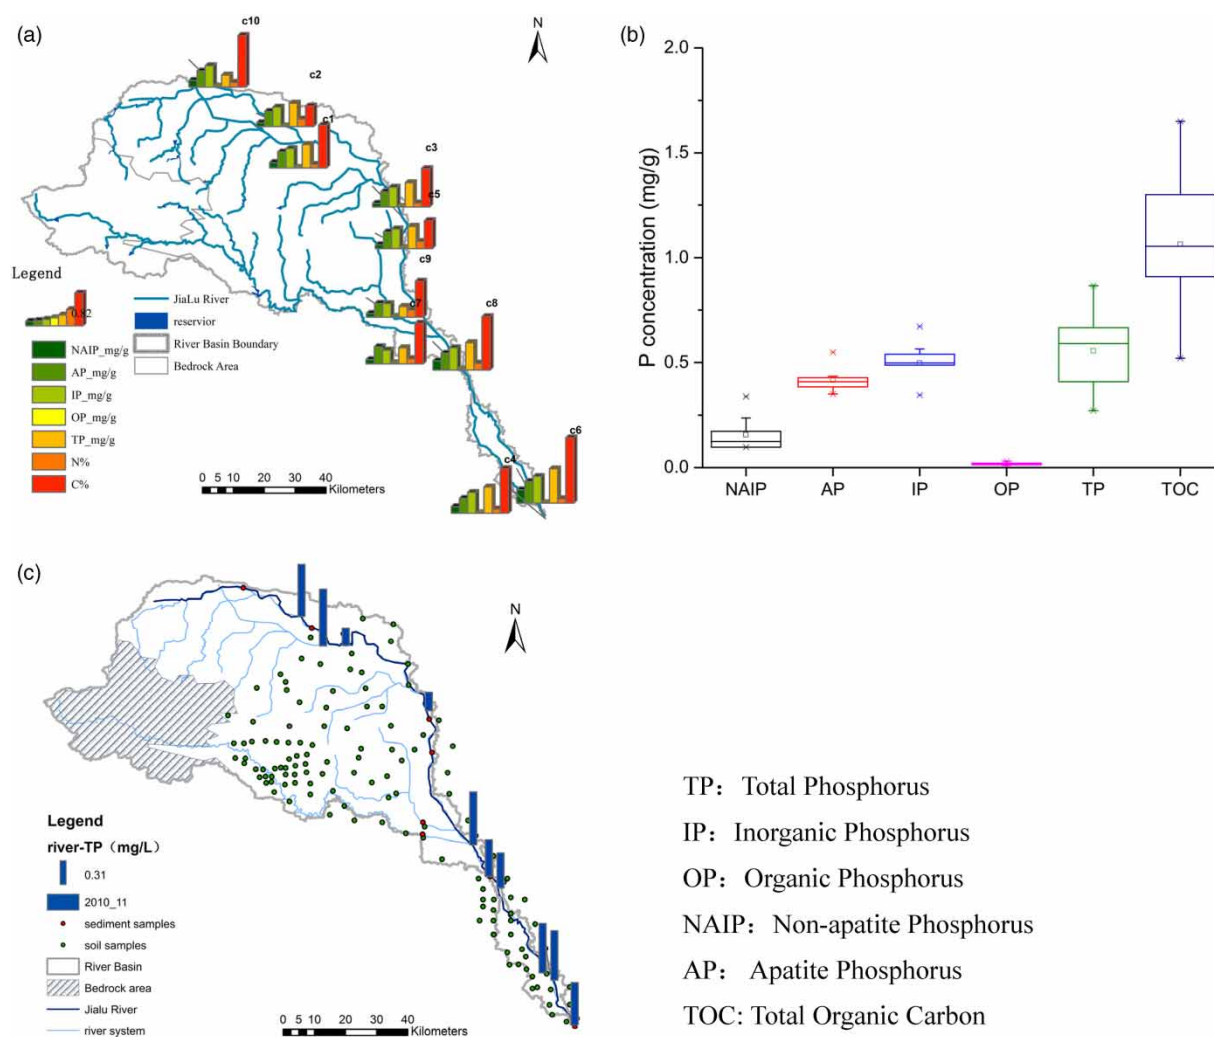

**Figure 3** | River sediment P distribution (a), composition (b) and river water TP (c) of the Jialu River.

TP: Total Phosphorus

IP: Inorganic Phosphorus

OP: Organic Phosphorus

NAIP: Non-apatite Phosphorus

AP: Apatite Phosphorus

TOC: Total Organic Carbon

**Table 2** | Soil P composition in different soil types

| Soil type                     | Area ratio (%) | Sample number | NAIP (mg/g) | AP (mg/g) | IP (mg/g) | OP (mg/g) | TP (mg/g) | TDP (mg/g) |
|-------------------------------|----------------|---------------|-------------|-----------|-----------|-----------|-----------|------------|
| Middle mixed soil             | 27.7           | 53            | 0.227       | 0.256     | 0.478     | 0.071     | 0.582     | 0.402      |
| Mixed soil                    | 6.9            | 15            | 0.307       | 0.236     | 0.538     | 0.054     | 0.610     | 0.421      |
| Meadow aeolian sandy soil     | 7.7            | 15            | 0.336       | 0.131     | 0.374     | 0.045     | 0.419     | 0.290      |
| Sandy soil                    | 15.2           | 12            | 0.288       | 0.208     | 0.560     | 0.061     | 0.668     | 0.462      |
| Cinnamonized fluvo-aquic soil | 6.8            | 12            | 0.154       | 0.185     | 0.395     | 0.100     | 0.527     | 0.364      |
| Fluvo-aquic cinnamon soil     | 2.3            | 5             | 0.134       | 0.325     | 0.473     | 0.110     | 0.553     | 0.382      |
| Calcareous cinnamon soil      | 11.1           | 5             | 0.333       | 0.101     | 0.378     | 0.048     | 0.481     | 0.332      |

Note: TP, Total Phosphorus; IP, Inorganic Phosphorus; OP, Organic Phosphorus; NAIP, Non-apatite Phosphorus; AP, Apatite Phosphorus; TDP, Total Dissolvable Phosphorus.

about 68.7% of the IP on average (0.325/0.473 mg/g). This soil took about 2.3% of the basin area, distributing mainly in the hawthorn complex alluvial plain when coupled with subsequent long-term agricultural activities, it led to high TP content and a high proportion of AP. The proportion of AP and NAIP in mixed soil and cinnamonized fluvo-aquic soil were roughly equal. Mixed soil (including middle mixed soil) was the main soil type in the study area (34.6%) presenting mainly in the slope area of plains. Fostering from the sandy silt of riverbed deposits and the upper humus with well-sorted particle size, mixed soil led to a stable P content.

Pearson Correlation Coefficients analysis (Supplementary Material, Table S2) indicated that soil IP and TP had a significant correlation ( $r = 0.825$ ,  $p < 0.01$ ,  $n = 132$ ), as well as NAIP and TP ( $r = 0.530$ ,  $p < 0.01$ ,  $n = 132$ ) in all soil samples. This result was caused by the high proportion of NAIP and IP in soil TP.

The spatial distribution of soil P showed that AP, IP and TP concentrations gradually increased downstream (Figure 4). At the same time, there was a significant symmetrical pattern cross river, among which IP was the most obvious one. OP showed no discernible pattern with the middle area concentration lower than that of upstream and downstream areas, resembling the NAIP. IP had the lowest concentration in the middle reach of the Jialu River between 0.10 and 1.00 mg/g. AP concentrations ranged from 0.03 to 1.00 mg/g, which was slightly higher than NAIP. Affected by the adsorption/desorption process, soil P content is related to particle size, pH, organic matter content and moisture (Kuo and Lotse 1974; Parfitt 1977). At the same time, NAIP can release bonded P under disturbed

redox conditions, which may be transformed to low soluble and inactive AP (Wang et al. 2017). This process may explain the high content of AP in the soil.

In the Jialu River Basin, agriculture is the main land use type (75.1%). According to the 10-year fertilizers application in the Jialu River Basin (2000–2010), the input of agricultural P fertilizer in the high TP area was over 10,000 tons/yr. Compared with other less intensive agricultural exploitation areas (China 2010), the significantly higher application indicated that P fertilizers were the main source of soil TP.

The content of soil OP in the research area was generally low, and there was no obvious distribution pattern, which may be due to the mineralization of biogenic OP in the soil and lack of OP input. TOC and IP were negatively correlated ( $r = -0.554$ ,  $p < 0.01$ ,  $n = 70$ ) (Supplementary Material, Table S3), which indicated that soil organic carbon could influence the soil P form significantly. It was reported that organic acid could increase the available phosphorous in soil and accelerate the accumulation of OP in specific soil type (Zhang et al. 2009), which may explain the negative association of the two parameters. This may also be explained by the simple dilution of IP in the soil by a poor phosphorous organic matter.

The loss of soil P in dissolved and particulate forms is influenced by topography, soil type, soil P content and soil hydrology (McDowell & Sharpley 2001), resulting in high uncertainty. Many studies have been devoted to estimating the P release amount and mechanism from agricultural soil to surface and subsurface runoff (McDowell & Sharpley 2001; Frossard et al. 2014), and it was found that P concentration in runoff was positively related to extractable soil P. Thus, the soil P surplus control was the most efficient

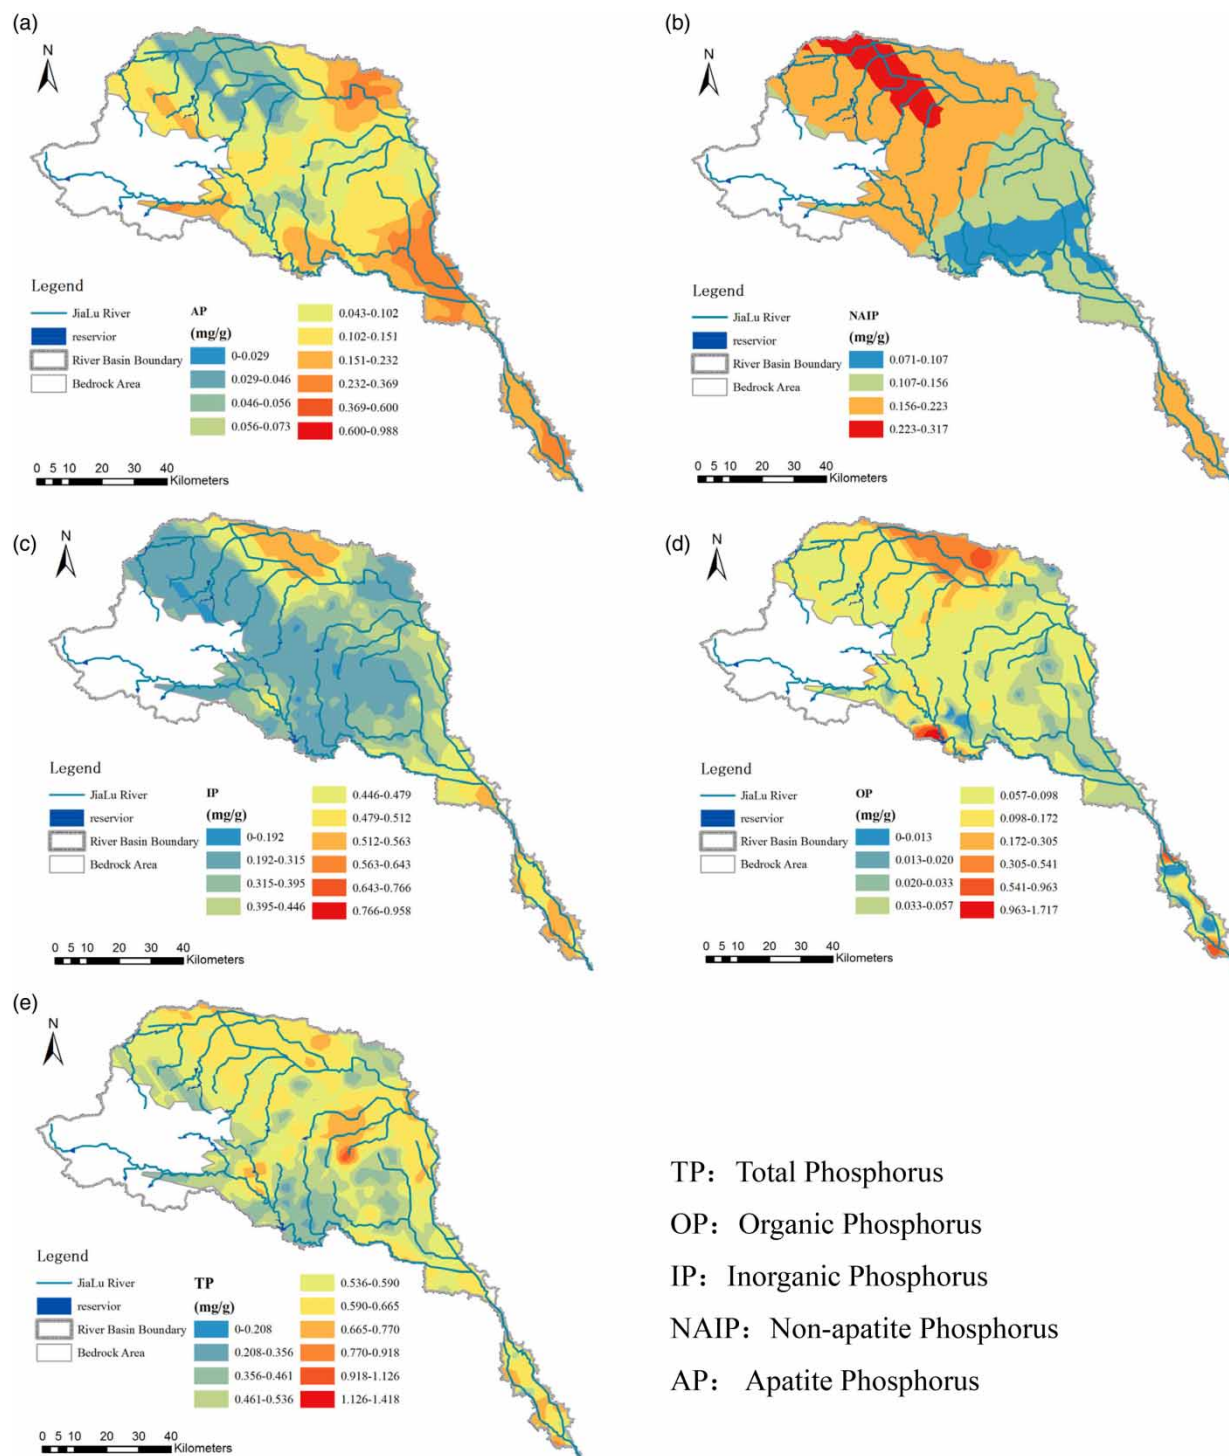

**Figure 4** | The Ordinary Kriging interpolation of soil AP (a), NAIP (b), IP (c), OP (d) and TP (e) in the Jialu River Basin.

way to release soil P loss through runoff. 50 mg/kg Mehlich-3 P for agronomic and 190 mg/kg for environmental threshold has been established in the USA (NRCS 2011).

Soil available P above 41.2 mg/kg can pose leaching risk (Bai *et al.* 2013). Xi *et al.* reported that the agronomic and environmental P threshold were 15 and 30 mg/kg,



respectively, in the semi-humid plain area of Yellow River and Huaihe River Basin (Xi *et al.* 2016). In this research, based on the average total dissolvable P (TDP) proportion of 69.1% in soil TP (Xi *et al.* 2016), TDP was from 94 to 622 mg/kg (393 mg/kg in average), which all exceeded (on average 13-fold) the environmental P threshold of 30 mg/kg. TDP in mixed soil (including middle mixed soil) and sandy soil (area ratio of 49.8%) were the highest in all soil types with an average of over 400 mg/kg, indicating a high P loss risk (Table 2). Therefore, stricter soil nutrient management strategies are recommended in the Jialu River Basin to control the loss of soil P.

### Soil P spatial variability

The contrast between the semivariograms of different soil P types was carried out to analyze the spatial correlation and variability of soil P (Figure 5 and Table 3). The cross-validation results are shown in Table 4.

In this study, the nugget coefficient of IP was larger than 0.75, indicating a weak spatial correlation. The nugget coefficient of TP, AP and NAIP was between 0.5 and 0.75, indicating a moderate spatial correlation. The nugget coefficient of OP was between 0.25 and 0.5, indicating a significant spatial correlation (Table 3). The observed nugget coefficients of all soil P types were classified as moderate or weak, except for OP, indicating a slight spatial dependence and low heterogeneity in the Jialu River Basin. Particularly, soil OP showed a significant spatial correlation, which was probably influenced by agricultural activity. Thus, it can be concluded that the soil P spatial distribution of the study area was the result of a combination of structural and random factors, which is highly complex (Goenster-Jordan *et al.* 2018). Eljebri reported a moderate to weak spatial variance between soil  $P_2O_5$  content in the irrigated plain of Doukkala, Morocco, which might be related to unbalanced P fertilizer application (Eljebri *et al.* 2018). The spatial dependence and heterogeneity of soil P in the Jialu River Basin were relatively low compared with the Danjiangkou basin (Li *et al.* 2020) where soil TP had moderate and high variability in soil with a CV of 40%. Similarly, in the study of spatial variability of the soil pedoindicators with different textures, the spatial dependence of almost all soil properties was classified as

moderate to weak (de Oliveira *et al.* 2018; Goenster-Jordan *et al.* 2018), which is consistent with this study. It was reported that most soil physical properties, such as particle size distribution, water content at field capacity, permanent wilting point and available water content of alluvial flood-plain soil, were also moderately spatial-dependent (Reza *et al.* 2015). The research in a hot and humid tropical region of India reported a varied spatial distribution pattern with moderate to strong spatial dependence for most of the soil properties, including pH, electrical conductivity, soil organic carbon, available P, K, S and B, exchangeable Ca and Mg, etc. (Behera *et al.* 2018). In another study, most variances in extractable soil P for the 0–15 cm depth were associated with differences among fields. However, the significant variance was associated with differences among sampling plots within each field (Wilson *et al.* 2016). It was shown that Particular P in rivers is primarily correlated to suspended solid concentrations, which in turn are correlated to average soil clay content and land use (Sandström *et al.* 2019). These results indicate that the spatial variability differed between soil parameters and was greatly influenced by the bedrock property, hydrologic background, weather condition and agricultural management.

The spatial variability of soil parameters can be influenced by many factors. It was reported that soil biogeochemical background corresponding to P inherited from natural soils at the conversion to agriculture and farming practices were the main drivers of the spatial variability in cropland soil P content (Ringeval *et al.* 2017). A structured spatial variability of soil parameters at different scales and magnitudes of strength was found in an Alfisol soil catena (Rosemary *et al.* 2017), and land use history showed a significant impact on the soil spatial variability. In this research, most of the samples were collected from farmland, so the influence of biogeochemical process (denitrification) and farming practices (wheat and corn rotation) on spatial variability of soil P might outweigh that of natural property. Besides, sampling depth also influenced the spatial variability as reported in other studies. Soil sampled deeper (from 3 to 15 cm) would reduce the variability of the measured P values, because soil P in 0–3 cm included a high level of statistical ‘noise’ (Kaul & Grafton 2017). It was reported that the chemical properties of soil have greater spatial dependence

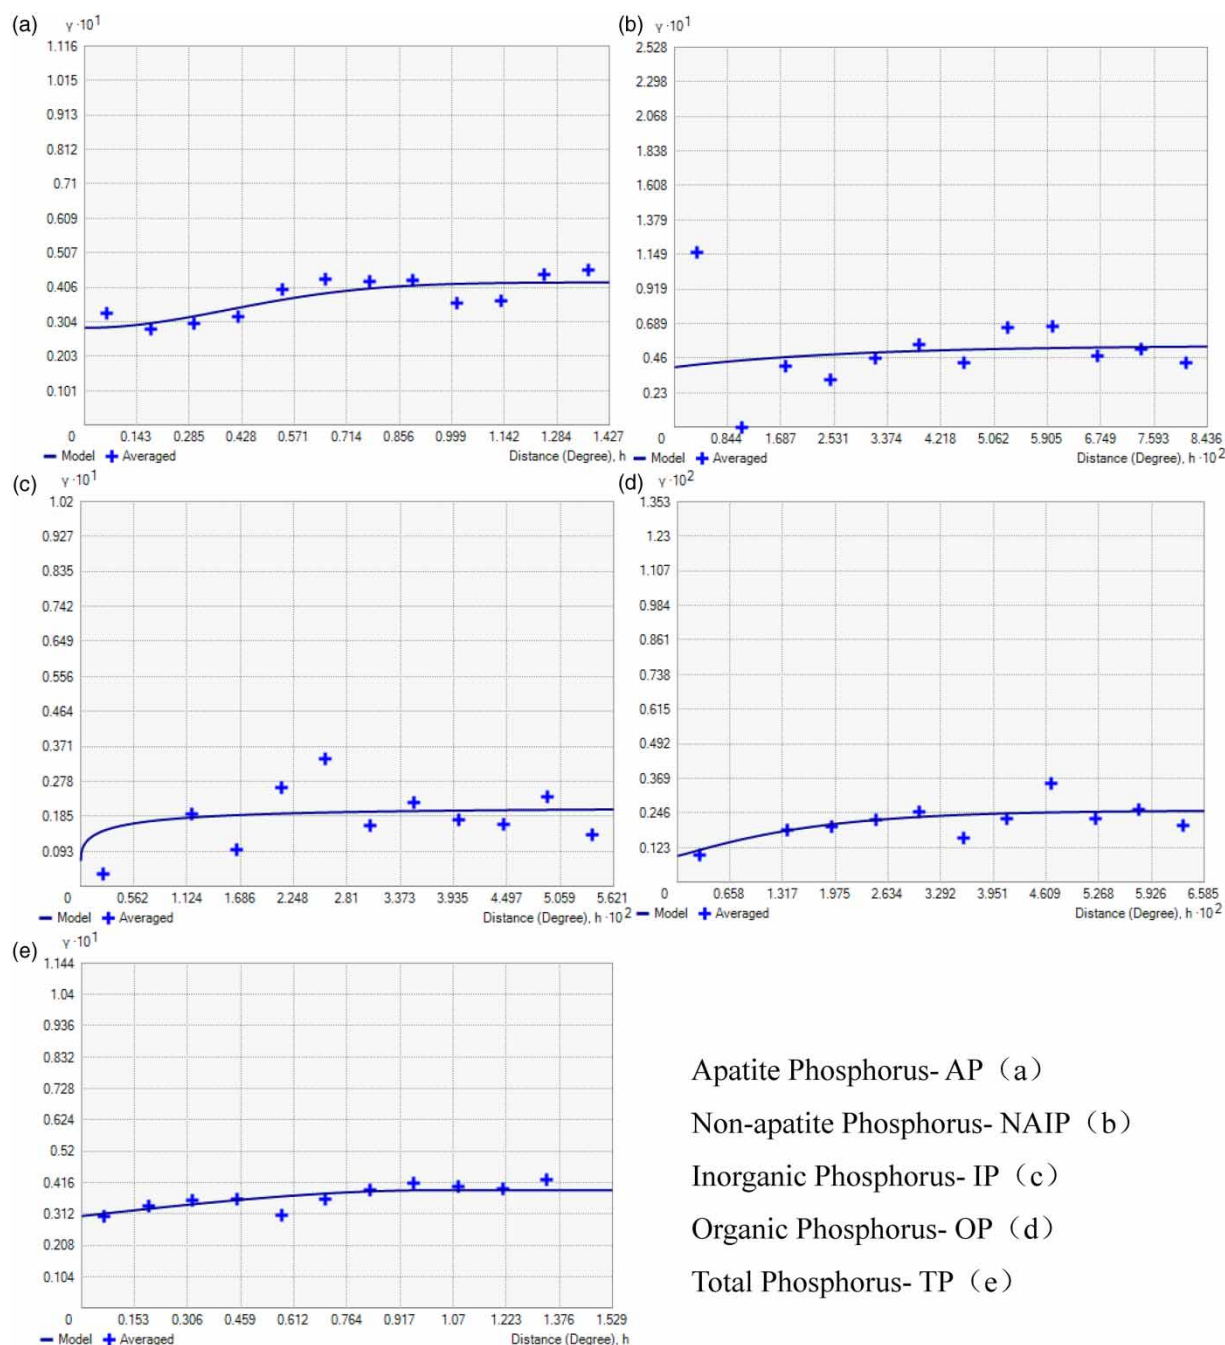

**Figure 5** | The semivariogram of soil P.

at 0–0.1 m, which are mostly influenced by an intrinsic factor, such as mineralogy and texture, whereas extrinsic variables such as tillage, fertilizer application, soil and water management and other management practices may control the variability of the moderately spatial-dependent properties (Ramzan & Wani 2018). In this research, a

mixed soil sample from 0 to 20 cm, which was in the optimal range, was collected for P measurement. In conclusion, the spatial prediction of soil properties using the geostatistical approach is an alternative for the ordinary difference method, which will help in site-specific farming in the study area. In future research, a better sampling strategy

**Table 3** | Geostatistical parameters of the best fitted semivariogram models for soil P

| P form | Fitted model | Nugget ( $C_0$ ) | Sill ( $C_0 + C$ ) | Range (km) | Nugget coefficient ( $C_0/C_0 + C$ ) | $R^2$ |
|--------|--------------|------------------|--------------------|------------|--------------------------------------|-------|
| AP     | Exponential  | 0.040            | 0.054              | 0.084      | 0.734                                | 0.69  |
| NAIP   | Gaussian     | 0.029            | 0.043              | 1.019      | 0.674                                | 0.00  |
| IP     | Exponential  | 0.018            | 0.020              | 0.042      | 0.919                                | 0.38  |
| OP     | Exponential  | 0.001            | 0.003              | 0.047      | 0.338                                | 0.05  |
| TP     | Exponential  | 0.028            | 0.039              | 1.019      | 0.726                                | 0.42  |

Note: AP, Apatite Phosphorus; NAIP, Non-apatite Phosphorus; IP, Inorganic Phosphorus; OP, Organic Phosphorus; TP, Total Phosphorus.

**Table 4** | Cross-validation parameters of Kriging prediction for soil P

| Parameter | AP    | NAIP  | IP    | OP    | TP    |
|-----------|-------|-------|-------|-------|-------|
| MAE       | 0.003 | 0.000 | 0.001 | 0.000 | 0.000 |
| RMSE      | 0.241 | 0.192 | 0.138 | 0.053 | 0.181 |

Note: TP, Total Phosphorus; IP, Inorganic Phosphorus; OP, Organic Phosphorus; NAIP, Non-apatite Phosphorus; AP, Apatite Phosphorus; MAE, mean absolute error; RMSE, root-mean-square error.

should be developed to minimize the influence of soil property uncertainty.

The spatial range for different components of soil P indicated that in a specific area, a greater number of samples are necessary for parameter determination to acquire appropriate statistical precision. In this research, the range of each soil P component was around 1 m, which indicated that observed values of soil P are influenced by environmental parameters over a smaller distance. A much larger range for soil micronutrients (495–2,110 m and 2,200–7,364 m) was reported by Foroughifar *et al.* (2013) and Dharejo *et al.* (2011). Generally, soil P can be influenced by many factors such as characteristics of soil mineralogy and weathering history, and particularly by human activities especially intensive agricultural fertilization, while micronutrients are mostly determined by bedrock type, which could be rarely influenced by other factors. Therefore, a precise soil P profile needs a dense sampling network.

### Aquatic P source identification

In this study, IP was the main P form in sediments (77.0–96.4%), most of which was composited with AP

(70.4–95.6%), resulting in a significant correlation ( $r = 0.910$ ,  $p < 0.01$ ,  $n = 7$ ) between them (Table 5). In the meantime, both IP and AP showed a significant correlation with TOC in the river sediments ( $r = 0.795/0.838$ ,  $p < 0.05$ ,  $n = 7$ ). The possible sources of sediment IP include self-generated AP and other bio-particles from the soil. Although the content of NAIP content was low in the research area, it can still be converted into soluble form under reductive conditions and enter the water column, which is also an important endogenous source of P load (Xiaona 2006). This soil P leaching and NAIP dissolving process might explain the dominant P form shift from NAIP to AP and from terrestrial soil to the aquatic environment.

It was worth noticing that sediment AP had a significant positive correlation with soil AP ( $r = 0.842$ ,  $p < 0.05$ ,  $n = 7$ ), while sediment OP was positively related to soil AP ( $r = 0.0841$ ,  $p < 0.05$ ,  $n = 7$ ) and negatively related to soil NAIP ( $r = -0.812$ ,  $p < 0.05$ ,  $n = 7$ ) (Table 5). AP is mainly formed during the deposition and early diagenesis of calcareous bio-particles in the upper layer of water, as well as the mineral debris produced by the rock weathering in the basin. Therefore, it can be inferred that soil P is the main source of sediment P, mainly in the form of AP. According to the binding state, Fe/Al/Mn hydroxide bonded phosphorous (NAIP), Ca-bound authigenic apatite P and detrital apatite P (AP), and exchangeable phosphorous (Ex-P) is the main form in sediment P, among which Fe/Al/Mn bonded P mainly comes from terrestrial input, reflecting the input intensity of terrestrial P sources (Yu *et al.* 2011), while in sediment mainly comes from aquatic organisms, reflecting the amount of aquatic biomass in the river ecosystem. These distinct sources might explain the negative correlation between soil NAIP and sediment OP content.

**Table 5** | Correlation between river water P, sediment P and soil P ( $n = 7$ )

|               | Water<br>TP | Sediment |         |       |         |         |         |         | Soil    |          |         |         |         |
|---------------|-------------|----------|---------|-------|---------|---------|---------|---------|---------|----------|---------|---------|---------|
|               |             | TP       | AP      | NAIP  | IP      | OP      | TN      | TOC     | AP      | NAIP     | IP      | OP      | TP      |
| Water_TP      | 1           | – 0.692  | – 0.319 | 0.006 | – 0.516 | – 0.206 | 0.049   | – 0.315 | – 0.251 | 0.716    | 0.187   | – 0.097 | 0.309   |
| Sediment_TP   |             | 1        | 0.690   | 0.215 | 0.588   | 0.248   | – 0.031 | 0.467   | 0.662   | – 0.523  | 0.493   | – 0.256 | 0.038   |
| Sediment_AP   |             |          | 1       | 0.340 | 0.910** | 0.678   | – 0.030 | 0.838*  | 0.842*  | – 0.570  | 0.628   | – 0.326 | 0.006   |
| Sediment_NAIP |             |          |         | 1     | 0.188   | 0.658   | 0.298   | 0.173   | 0.597   | – 0.614  | 0.178   | – 0.068 | – 0.225 |
| Sediment_IP   |             |          |         |       | 1       | 0.745   | 0.060   | 0.795*  | 0.801   | – 0.777  | 0.304   | – 0.307 | – 0.286 |
| Sediment_OP   |             |          |         |       |         | 1       | 0.466   | 0.467   | 0.841*  | – 0.812* | 0.048   | – 0.414 | – 0.548 |
| Sediment_TN   |             |          |         |       |         |         | 1       | – 0.502 | 0.403   | – 0.182  | – 0.466 | – 0.765 | – 0.790 |
| Sediment_TOC  |             |          |         |       |         |         |         | 1       | 0.553   | – 0.562  | 0.685   | 0.173   | 0.315   |
| Soil_AP       |             |          |         |       |         |         |         |         | 1       | – 0.583  | 0.443   | – 0.659 | – 0.187 |
| Soil_NAIP     |             |          |         |       |         |         |         |         |         | 1        | 0.126   | – 0.013 | 0.519   |
| Soil_IP       |             |          |         |       |         |         |         |         |         |          | 1       | – 0.106 | 0.747   |
| Soil_OP       |             |          |         |       |         |         |         |         |         |          |         | 1       | 0.305   |
| Soil_TP       |             |          |         |       |         |         |         |         |         |          |         |         | 1       |

Note: AP, Apatite Phosphorus; NAIP, Non-apatite Phosphorus; IP, Inorganic Phosphorus; OP, Organic Phosphorus; TP, Total Phosphorus; TOC, Total Organic Carbon; TN, Total Nitrogen.

\*Significant correlation at 0.05 level (two-tailed).

\*\*Significant correlation at 0.01 level (two-tailed).

Based on the TP accumulation pattern analysis, TP in upstream and sub-streams sediments were lower than that of the downstream and the mainstream (Figure 6), revealing an accumulation behavior of sediments P along the Jialu River. At the same time, a good consistency of TP in the sediment and water can be seen, which was also subject to soil TP content, and further proved the extensive P input from soil to river water. Ning *et al.* (2021) used the interactive

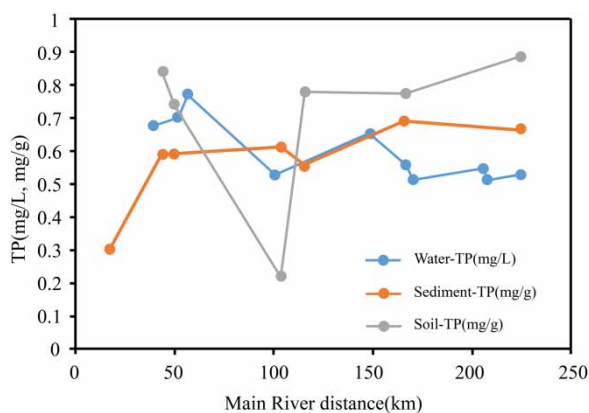

**Figure 6** | The total phosphorus (TP) accumulation pattern along the Jialu River in soil, river sediment and river water.

evaluation index method to evaluate the risk of soil P loss, but this method could not identify the source of P in rivers. It was reported that P-rich soils lost substantial amounts of P stocks as high as 70% under the influence of cultivation (Alvarez *et al.* 2018), most of which might enter the aquatic ecosystem through runoff. Under this instruction, critical source areas for P loss could be identified. Many states in the USA considered the development of recommendations for P applications and watershed management based on the potential for P loss in agricultural runoff, ranging from 50 mg/kg in Delaware to 200 mg/kg in Texas (Sharpley 2001). The high risk of soil phosphorus loss in the Jialu River Basin indicates the urgency and necessity of applying the best management practices.

## CONCLUSIONS

IP was the main form of soil P in the Jialu River Basin (82.13%). The soil P composition differed significantly in different soil types. For example, AP was the primary form of IP in fluvo-aquic cinnamon soil (the area ratio of 2.3%), while NAIP dominated in meadow aeolian sandy soil (the

area ratio of 7.7%). In contrast, proportions of AP and NAIP in most of the soil types such as mixed soil were roughly equal (the area ratio of 34.6%). Calculated soil TDP varied from 94 to 622 mg/kg (393 mg/kg on average), which all exceeded the environmental threshold of 30 mg/kg. TDP in mixed soil and sandy soil (the area ratio of 49.8%) was the highest (average >400 mg/kg), indicating a high P loss risk. The spatial variability of soil P was moderate or weak, indicating a low heterogeneity in the Jialu River Basin.

In the river sediment, IP (77.0–96.4% of TP) had a significant correlation with TP ( $r = 0.766$ ,  $p < 0.01$ ,  $n = 10$ ). Sediment IP, as well as AP (70.4–95.6% of IP), both showed a significant correlation with sediment TOC ( $r = 0.795/0.838$ ,  $p < 0.05$ ,  $n = 7$ ). At the same time, sediment AP had a significant positive correlation with soil AP ( $r = 0.842$ ,  $p < 0.05$ ,  $n = 7$ ), which confirmed that soil AP as the main source of sediment P was associated with organic matter from weathered soil. Furthermore, an accumulation behavior of sediment P along the Jialu River and a consistent trend with water TP along the flow path was revealed.

## ACKNOWLEDGEMENTS

This study was funded by The Major Projects of Science and Technology for Water Pollution Control and Management (Grant Nos. 2017ZX07602-003 and 2012ZX07204-003).

## DATA AVAILABILITY STATEMENT

All relevant data are included in the paper or its Supplementary Information.

## REFERENCES

- Ahmad, M., Muhammad, D., Mussarat, M., Khan, A. A., Khan, S. F. & Javed, M. W. 2016 [Appraisal for site specific plant nutrient management through spatial variability and mapping in hilly areas of northern Pakistan](#). *Journal of Soils and Sediments* **17**, 936–948.
- Alvarez, R., Gangi, D., Caffaro, M., Molina, C. & Berhongaray, G. 2018 [Cultivation affected the level of inorganic phosphorus more than the organic pool of the Pampas soils in Argentina](#). *Archives of Agronomy and Soil Science* **65**, 1022–1033.
- Amundson, R., Berhe, A. A., Hopmans, J. W., Olson, C., Sztein, A. E. & Sparks, D. L. 2015 [Soil and human security in the 21st century](#). *Science* **348**, 1261071.
- Bai, Z., Li, H., Yang, X., Zhou, B., Shi, X., Wang, B., Li, D., Shen, J., Chen, Q., Qin, W., Oenema, O. & Zhang, F. 2013 [The critical soil P levels for crop yield, soil fertility and environmental safety in different soil types](#). *Plant Soil* **372**, 27–37.
- Behera, S. K., Mathur, R. K., Shukla, A. K., Suresh, K. & Prakash, C. 2018 [Spatial variability of soil properties and delineation of soil management zones of oil palm plantations grown in a hot and humid tropical region of southern India](#). *Catena* **165**, 251–259.
- Cambardella, C. A., Moorman, T. B. & Novak, J. 1994 [Filed scale variability of soil properties in central Iowa soils](#). *Soil Science Society of America Journal* **58**, 1501–1511.
- Carpenter, S. R., Caraco, N. F., Correll, D. L., Howarth, R. W., Sharpley, A. N. & Smith, V. H. 1998 [Nonpoint pollution of surface waters with phosphorus and nitrogen](#). *Ecological Applications* **8**, 559–568.
- China SBo 2010 Statistical Yearbook. China Statistics Press.
- Denton, O. A., Aduramigba-Modupe, V. O., Ojo, A. O., Adeoyolanu, O. D., Are, K. S., Adelana, A. O., Oyedele, A. O., Adetayo, A. O., Oke, A. O. & Tejada Moral, M. 2017 [Assessment of spatial variability and mapping of soil properties for sustainable agricultural production using geographic information system techniques \(GIS\)](#). *Cogent Food & Agriculture* **3**, 1–12.
- de Oliveira, I. A., de Freitas, L., de Aquino, R. E., Casagrande, J. C., Campos, M. C. C. & Silva, L. S. 2018 [Chemical and physical pedoindicators of soils with different textures: spatial variability](#). *Environmental Earth Sciences* **77**, 1–14.
- Dharejo, K. A., Anuar, A. R., Khanif, Y. M., Samsuri, A. W. & Junejo, N. 2011 [Spatial variability of Cu, Mn and Zn in marginal sandy beach ridges soil](#). *African Journal of Agricultural Research* **6**, 3493–3498.
- Eljebri, S., Mounir, M., Faroukh, A. T., Zouahri, A. & Tellal, R. 2018 [Application of geostatistical methods for the spatial distribution of soils in the irrigated plain of Doukkala, Morocco](#). *Modeling Earth Systems and Environment* **5**, 669–687.
- El-Nahhal, I. Y., Al-Najar, H. & El-Nahhal, Y. 2014a [Cations and anions in sewage sludge from Gaza waste water treatment plant](#). *American Journal of Analytical Chemistry* **5**, 655–665.
- El-Nahhal, I. Y., Al-Najar, H. & El-Nahhal, Y. 2014b [Physicochemical properties of sewage sludge from Gaza](#). *International Journal of Geosciences* **5**, 586–594.
- Feagley, S. E. & Lory, J. 2005 [Soil test phosphorus threshold levels](#). In *SERA-17 Position Paper Sera-17*, pp. 1–9.
- Foroughifar, H., Jafarzadeh, A. A., Torabi, H., Pakpour, A. & Miransari, M. 2013 [Using geostatistics and geographic information system techniques to characterize spatial variability of soil properties, including micronutrients](#).



- Communications in Soil Science and Plant Analysis* **44**, 1273–1281.
- Frossard, E., Demaria, P., Sinaj, S. & Schärer, M. 2014 A flow-through reactor to assess potential phosphate release from agricultural soils. *Geoderma* **219–220**, 125–135.
- Fu, W., Tunney, H. & Zhang, C. 2010 Spatial variation of soil nutrients in a dairy farm and its implications for site-specific fertilizer application. *Soil and Tillage Research* **106**, 185–193.
- Goenster-Jordan, S., Jannoura, R., Jordan, G., Buerkert, A. & Joergensen, R. G. 2018 Spatial variability of soil properties in the floodplain of a river oasis in the Mongolian Altay Mountains. *Geoderma* **330**, 99–106.
- Guoan, T. & Xin, Y. 2006 *Geographic Information Systems Spatial Analysis Experimental Course*. Science Press, Beijing.
- Hua, R. 2010 *Pollution Characteristics in Urban River Sediments and Extracellular Enzyme Activities Research - Take Qinhuai River as Example Hohai University*.
- Jalali, M. & Jalali, M. 2017 Assessment risk of phosphorus leaching from calcareous soils using soil test phosphorus. *Chemosphere* **171**, 106–117.
- Kaul, T. & Grafton, M. 2017 Geostatistical determination of soil noise and soil phosphorus spatial variability. *Agriculture* **7**, 1–10.
- Khan, A., Lu, G., Ayaz, M., Zhang, H., Wang, R., Lv, F., Yang, X., Sun, B. & Zhang, S. 2018 Phosphorus efficiency, soil phosphorus dynamics and critical phosphorus level under long-term fertilization for single and double cropping systems. *Agriculture, Ecosystems & Environment* **256**, 1–11.
- Kuo, S. & Lotse, G. 1974 Kinetics of phosphate adsorption and desorption by lake sediments. *Soil Science Society of America journal* **38**, 50–54.
- Lackemariam, F., Kibret, K., Mamo, T. & Shiferaw, H. 2018 Accounting spatial variability of soil properties and mapping fertilizer types using geostatistics in Southern Ethiopia. *Communications in Soil Science and Plant Analysis* **49**, 124–137.
- Lark, R. M. 2000 Estimating variograms of soil properties by the method-of-moments and maximum likelihood. *European Journal of Soil Science* **51**, 717–728.
- Li, Z., Zhang, R., Liu, C., Zhang, R., Chen, F. & Liu, Y. 2020 Phosphorus spatial distribution and pollution risk assessment in agricultural soil around the Danjiangkou reservoir, China. *Science of The Total Environment* **699**, 134417.
- Liu, J. & Zhang, F. 2000 Dynamics of soil P pool in a long-term fertilizing experiment of wheat-maize rotation I. Crop yield effect of fertilizer P and dynamics of soil TP and IP. *Chinese Journal of Applied Ecology* **11**, 360–364.
- Liu, S., Hou, X., Yang, M., Cheng, F., Coxixio, A., Wu, X. & Zhang, Y. 2018 Factors driving the relationships between vegetation and soil properties in the Yellow River Delta, China. *Catena* **165**, 279–285.
- Magnonea, D., Bouwman, A. F., van der Zee, S. E. A. T. M., Sattari, S. Z., Beusen, A. H. W. & Niasar, V. J. 2017 Efficiency of phosphorus resource use in Africa as defined by soil chemistry and the impact on crop production. *Energy Procedia* **123**, 97–104.
- Matos-Moreira, M., Lemerrier, B., Dupas, R., Michot, D., Viaud, V., Akkal-Corfini, N., Louis, B. & Gascuel-Oudoux, C. 2017 High-resolution mapping of soil phosphorus concentration in agricultural landscapes with readily available or detailed survey data. *European Journal of Soil Science* **68**, 281–294.
- McDowell, R. W. & Sharpely, A. N. 2001 Approximating phosphorus release from soils to surface runoff and subsurface drainage. *Journal of Environmental Quality* **30**, 508–520.
- Ministry of Environmental Protection of P. R. China GAoQS, Inspection and Quarantine of P.R. China 2002 *Environmental Quality Standard for Surface Water*.
- Mocek, A. & Owczarzak, W. 2011 Parent material and soil physical properties. In: *Encyclopedia of Agrophysics* (J. Gliński, J. Horabik & J. Lipiec, eds). Springer, Dordrecht, Netherlands, pp. 543–547.
- Mousavifard, S. M., Momtaz, H., Sepehr, E., Davatgar, N. & Sadaghiani, M. H. R. 2013 Determining and mapping some soil physico-chemical properties using geostatistical and GIS techniques in the Naqade region, Iran. *Archives of Agronomy and Soil Science* **59**, 1573–1589.
- Ning, H. R., Liu, Q. M., Zhang, S. W., Ye, H. C., Shen, Q., Zhang, W. T. & Li, Z. 2021 Simple assessment of farmland soil phosphorus loss risk at county scale with high landscape heterogeneity. *International Journal of Agricultural and Biological Engineering* **14** (2), 126–134.
- NRCS N 2011 *Nutrient Management Standard*.
- Parfitt, L. 1977 Phosphate adsorption on an oxisol. *Soil Science Society of America Journal* **41**, 1064–1067.
- Ramzan, S. & Wani, M. A. 2018 Geographic information system and geostatistical techniques to characterize spatial variability of soil micronutrients including toxic metals in an agricultural farm. *Communications in Soil Science and Plant Analysis* **49**, 463–477.
- Reza, S. K., Nayak, D. C., Chattopadhyay, T., Mukhopadhyay, S., Singh, S. K. & Srinivasan, R. 2015 Spatial distribution of soil physical properties of alluvial soils: a geostatistical approach. *Archives of Agronomy and Soil Science* **62**, 972–981.
- Ringeval, B., Augusto, L., Monod, H., van Apeldoorn, D., Bouwman, L., Yang, X., Achat, D. L., Chini, L. P., Van Oost, K., Guenet, B., Wang, R., Decharme, B., Nesme, T. & Pellerin, S. 2017 Phosphorus in agricultural soils: drivers of its distribution at the global scale. *Global Change Biology* **23**, 3418–3432.
- Rosemary, F., Vitharana, U. W. A., Indraratne, S. P., Weerasooriya, R. & Mishra, U. 2017 Exploring the spatial variability of soil properties in an Alfisol soil catena. *Catena* **150**, 53–61.
- Sandström, S., Futter, M. N., Kyllmar, K., Bishop, K., O'Connell, D. W. & Djodjic, F. 2019 Particulate phosphorus and suspended solids losses from small agricultural catchments: links to stream and catchment characteristics. *Science of The Total Environment* **711**, 134616.

- Sharpley, A. 2001 *Managing Phosphorus for Agriculture and the Environment (CAT-UC162)*. The Pennsylvania State University, Pennsylvania.
- Sharpley, A. N., Chapra, S. C., Wedepohl, R., Sims, J. T., Daniel, T. C. & Reddy, K. R. 1994 [Managing agricultural phosphorus for protection of surface waters: issues and option](#). *Journal of Environmental Quality* **23**, 437–451.
- Sharpley, A. N., Kleinman, P. J. A., Heathwaite, A. L., Gburek, W. J., Weld, J. L. & Folmar, G. J. 2008 [Integrating contributing areas and indexing phosphorus loss from agricultural watersheds](#). *Journal of Environmental Quality* **37**, 1488.
- Squires, V. R. 2009 *Rangeland Degradation and Recovery in China's Pastoral Lands*. CAB International, London.
- The Huaihe River Commission of the Ministry of Water Resources, P. R. China 2010 Study on ecological water use regulation in Huaihe River Basin, p. 133.
- Tianhai, M., Jing, X., Nan, S. & Xiaohong, R. 2016 The study on distribution of dry farming agricultural non-point source pollution load and influencing factors in Jialu River Watershed. *Journal of Nanjing University (Natural Sciences)* **52**, 77–85.
- Vasu, D., Singh, S. K., Sahu, N., Tiwary, P., Chandran, P., Duraisami, V. P., Ramamurthy, V., Lalitha, M. & Kalaiselvi, B. 2017 [Assessment of spatial variability of soil properties using geospatial techniques for farm level nutrient management](#). *Soil and Tillage Research* **169**, 25–34.
- Vilmin, L., Mogollón, J. M., Beusen, A. H. W. & Bouwman, A. F. 2018 Forms and subannual variability of nitrogen and phosphorus loading to global river networks over the 20th century. *GPC* **163**, 67–85.
- Wang, L., Xia, J., Yu, J., Yang, L., Zhan, C., Qiao, Y. & Lu, H. 2017 identification of major nutrients in surface sediments of Nansi Lake, China. *Water* **9**, 1–12.
- Wenhua, W., Jiazhong, Q., Ruigang, Z. & Yubo, L. 2018 Distribution characteristics of phosphorus in surface soils of typical small water shed in Chaohu Lake. *Environmental Engineering* **36**, 131–136.
- Wilson, H. F., Satchithanatham, S., Moulin, A. P. & Glenn, A. J. 2016 [Soil phosphorus spatial variability due to landform, tillage, and input management: a case study of small watersheds in southwestern Manitoba](#). *Geoderma* **280**, 14–21.
- Xi, B., Zhai, L.-m., Liu, J., Liu, S., Wang, H.-y., Luo, C.-y., Ren, T.-z. & Liu, H.-b. 2016 [Long-term phosphorus accumulation and agronomic and environmental critical phosphorus levels in Haplic Luvisol soil, northern China](#). *Journal of Integrative Agriculture* **15**, 200–208.
- Xiaona, W. 2006 *Forms of Phosphorus and Sedimentary Section Migration and Transformation Research in Westlake Sediments Zhejiang University*.
- Yu, Y., Jinming, S., Xuegang, L., Yuan, H. & Ning, L. 2011 [Indicative significance of biogenic elements to eco-environmental changes in waters](#). *Acta Ecologica Sinica* **32**, 1623–1632.
- Zhang, A.-Q., He, L.-Y., Zhao, H.-E., Guo, Z.-H. & Cui, X.-M. 2009 Effect of organic acids on inorganic phosphorus transformation in soils and its readily available phosphate. *Acta Ecologica Sinica* **29**, 4061–4069.
- Zhang, Q., Yang, Z., Li, Y., Chen, D., Zhang, J. & Chen, M. 2010 [Spatial variability of soil nutrients and GIS-based nutrient management in Yongji County, China](#). *International Journal of Geographical Information Science* **24**, 965–981.
- Zhou, X. Y., Zhao, X., Bao, H. J., Li, H. H., Li, G. D. & Lin, Q. M. 2004 The evaluation of phosphorus leaching risk of 23 Chinese soils. I leaching criterion. *Acta Ecologica Sinica* **24**, 2275–2280.

First received 23 February 2021; accepted in revised form 26 April 2021. Available online 5 May 2021
